# Supplementary material for: Mortality in Escherichia coli bloodstream infections: a multinational population-based cohort study
Source: PubMed Central journal article supplement (PMC8229717; doi:10.1186/s12879-021-06326-x), 2021-06-25
Supplement: 12879_2021_6326_MOESM1_ESM.pdf [file 12879_2021_6326_MOESM1_ESM.pdf]

## **Additional File 1**

**Contains:** Supplementary Tables 1 – 5

**For manuscript:** Mortality in *Escherichia coli* bloodstream infections: a multinational population-based cohort study

**Authors:** Melissa C MacKinnon<sup>1</sup>, Scott A McEwen<sup>1</sup>, David L. Pearl<sup>1</sup>, Outi Lyytikäinen<sup>2</sup>, Gunnar Jacobsson<sup>3,4</sup>, Peter Collignon<sup>5,6</sup>, Daniel B. Gregson<sup>7,8</sup>, Louis Valiquette<sup>9</sup>, and Kevin B Laupland<sup>10,11,12</sup>

### **Institutional Affiliations:**

<sup>1</sup>–Department of Population Medicine, University of Guelph, Guelph, Ontario, Canada

<sup>2</sup>–Department of Health Security, National Institute for Health and Welfare, Helsinki, Finland

<sup>3</sup>–Department of Infectious Diseases, Skaraborg Hospital, Skövde, Sweden

<sup>4</sup>–CARE - Center for Antibiotic Resistance Research, Institute of Biomedicine, University of Gothenburg, Gothenburg, Sweden

<sup>5</sup>– Department of Infectious Disease and Microbiology, The Canberra Hospital, Garran, Australian Capital Territory, Australia

<sup>6</sup>– Medical School, Australian National University, Acton, Australian Capital Territory, Australia

<sup>7</sup>–Departments of Medicine, and Pathology and Laboratory Medicine, University of Calgary, Calgary, Alberta, Canada

<sup>8</sup>–Alberta Health Services, Calgary Zone, Calgary, Alberta, Canada

<sup>9</sup>–Department of Microbiology-Infectious Diseases, Université de Sherbrooke, Sherbrooke, QC, Canada

<sup>10</sup>–Department of Medicine, Royal Inland Hospital, Kamloops, British Columbia, Canada

<sup>11</sup>–Department of Intensive Care Medicine, Royal Brisbane and Women’s Hospital, Brisbane, Queensland, Australia

<sup>12</sup>–Faculty of Health, Queensland University of Technology, Brisbane, Queensland, Australia

### **Corresponding Author**

Melissa C. MacKinnon  
melissa.c.mackinnon@gmail.com

**Supplementary Table 1** – Proportion of *E. coli* bloodstream infection patients with 30-day mortality by region that were resistant to third-generation cephalosporins and location of onset based on data from the multinational population-based cohort study (2014 to 2018).

| <b>Region</b>    | <b>Proportion resistant to 3GC (#R/Total)</b> | <b>Proportion community-onset (Community-onset/Total)</b> | <b>Proportion hospital-onset (Hospital-onset/Total)</b> |
|------------------|-----------------------------------------------|-----------------------------------------------------------|---------------------------------------------------------|
| Calgary          | 24.2% (109/450)                               | 71.3% (321/450)                                           | 28.7% (129/450)                                         |
| Finland          | 9.3% (210/2252)                               | 65.4% (1472/2252)                                         | 34.6% (780/2252)                                        |
| Sherbrooke       | 4.7% (2/43)                                   | 69.8% (30/43)                                             | 30.2% (13/43)                                           |
| Skaraborg        | 3.5% (5/142)                                  | 78.2% (111/142)                                           | 21.8% (31/142)                                          |
| Western interior | 13.5% (10/74)                                 | 71.6% (53/74)                                             | 28.4% (21/74)                                           |
| Total            | 11.4% (336/2961)                              | 67.1% (1987/2961)                                         | 32.9% (974/2961)                                        |

Abbreviations: 3GC – Third-generation cephalosporins; R – Resistant

**Supplementary Table 2** – Counts of 30-day mortality and incident *E. coli* bloodstream infections, length of patient follow-up, case fatality risks, and crude mortality rates based on data from a multinational population-based cohort study (2014 to 2018).

| <b>Region</b>    | <b>Count of 30-day mortality in <i>E. coli</i> BSI cases</b> | <b>Count of incident <i>E. coli</i> BSI cases</b> | <b>Length of follow-up (patient-years)</b> | <b>Case fatality risk (%)</b> | <b>Crude mortality rate (deaths/100,000 person-years)</b> |
|------------------|--------------------------------------------------------------|---------------------------------------------------|--------------------------------------------|-------------------------------|-----------------------------------------------------------|
| Calgary          | 450                                                          | 3773                                              | 8185926                                    | 11.9                          | 5.5                                                       |
| Finland          | 2252                                                         | 24629                                             | 27426758                                   | 9.1                           | 8.2                                                       |
| Sherbrooke       | 43                                                           | 596                                               | 820430                                     | 7.2                           | 5.2                                                       |
| Skaraborg        | 142                                                          | 1347                                              | 1319420                                    | 10.5                          | 10.8                                                      |
| Western interior | 74                                                           | 578                                               | 924714                                     | 12.8                          | 8.0                                                       |
| Total            | 2961                                                         | 30923                                             | 38677248                                   | 9.6                           | 7.7                                                       |

Abbreviation: BSI – Bloodstream infection

**Supplementary Table 3** – Crude odds ratios (95% confidence intervals and p-values) for the univariable logistic regression models estimating associations between 30-day mortality in *E. coli* bloodstream infections, and region, year, location of onset, third-generation cephalosporin resistance, sex and age based on data from a multinational population-based cohort study (2014 to 2018).

| <b>Variable</b>          | <b>OR</b> | <b>95% CI</b> | <b>p-value</b>       |
|--------------------------|-----------|---------------|----------------------|
| <b>Region</b>            |           |               | < 0.001 <sup>a</sup> |
| Finland                  | 1.00      | referent      |                      |
| Calgary                  | 1.35      | 1.21-1.50     | <0.001               |
| Sherbrooke               | 0.77      | 0.56-1.06     | 0.107                |
| Skaraborg                | 1.17      | 0.98-1.40     | 0.084                |
| Western interior         | 1.46      | 1.14-1.87     | 0.003                |
| <b>Year</b>              |           |               | 0.166 <sup>a</sup>   |
| 2014                     | 1.00      | referent      |                      |
| 2015                     | 0.90      | 0.80-1.02     | 0.097                |
| 2016                     | 0.92      | 0.81-1.04     | 0.167                |
| 2017                     | 0.87      | 0.77-0.98     | 0.020                |
| 2018                     | 0.88      | 0.78-0.99     | 0.036                |
| <b>Location of Onset</b> |           |               |                      |
| Community-onset          | 1.00      | referent      |                      |
| Hospital-onset           | 2.53      | 2.33-2.75     | <0.001               |
| <b>3GC-R</b>             |           |               |                      |
| Susceptible              | 1.00      | referent      |                      |
| Resistant                | 1.63      | 1.44-1.84     | <0.001               |
| <b>Sex</b>               |           |               |                      |
| Female                   | 1.00      | referent      |                      |
| Male                     | 1.49      | 1.38-1.61     | <0.001               |
| <b>Age Category</b>      |           |               |                      |
| <70-years-old            | 1.00      | referent      |                      |
| ≥70-years-old            | 1.80      | 1.65-1.96     | <0.001               |

Abbreviations: OR – Odds ratio; CI – Confidence interval

<sup>a</sup> Overall p-value for variable estimated using a likelihood ratio test

**Supplementary Table 4** – Directly age and sex standardized *E. coli* bloodstream infection mortality rates for overall, third-generation cephalosporin-resistant and susceptible *E. coli* bloodstream infections based on data from a multinational population-based cohort study (2014 to 2018).

| Variable         | Directly <sup>a</sup> Standardized Mortality Rate <sup>b</sup> (Rank <sup>c</sup> ) |         |         |
|------------------|-------------------------------------------------------------------------------------|---------|---------|
|                  | Overall                                                                             | 3GC-R   | 3GC-S   |
| <b>Region</b>    |                                                                                     |         |         |
| Calgary          | 8.9 (2)                                                                             | 2.0 (1) | 6.9 (4) |
| Finland          | 8.5 (3)                                                                             | 0.8 (3) | 7.7 (2) |
| Sherbrooke       | 5.4 (5)                                                                             | 0.3 (4) | 5.1 (5) |
| Skaraborg        | 9.6 (1)                                                                             | 0.3 (4) | 9.2 (1) |
| Western interior | 8.4 (4)                                                                             | 1.3 (2) | 7.2 (3) |
| <b>Year</b>      |                                                                                     |         |         |
| 2014             | 8.7                                                                                 | 1.0     | 7.7     |
| 2015             | 8.1                                                                                 | 0.9     | 7.2     |
| 2016             | 8.4                                                                                 | 1.0     | 7.4     |
| 2017             | 8.4                                                                                 | 0.9     | 7.5     |
| 2018             | 8.9                                                                                 | 0.9     | 7.9     |
| <b>Total</b>     |                                                                                     |         |         |
| Overall          | 8.5                                                                                 | 1.0     | 7.6     |

Abbreviations: 3GC-R – Third-generation cephalosporin-resistant; 3GC-S – Third-generation cephalosporin-susceptible; CI – Confidence interval

<sup>a</sup> Standard population – EU28 2018 population

<sup>b</sup> Units for the rates are deaths/100,000 person-years

<sup>c</sup> Relative ranking of rates for regions from highest (1) to lowest (5)

**Supplementary Table 5** – Crude incidence rate ratios (95% confidence intervals and p-values) for the univariable Poisson regression models estimating associations between *E. coli* bloodstream infection 30-day mortality rates, and region, year, sex and age based on data from a multinational population-based cohort study (2014 to 2018).

| <b>Variable</b>     | <b>IRR</b> | <b>95% CI</b> | <b>p-value</b>      |
|---------------------|------------|---------------|---------------------|
| <b>Region</b>       |            |               | <0.001 <sup>a</sup> |
| Finland             | 1.00       | referent      |                     |
| Calgary             | 0.67       | 0.60-0.74     | <0.001              |
| Sherbrooke          | 0.64       | 0.47-0.86     | 0.004               |
| Skaraborg           | 1.31       | 1.11-1.55     | 0.002               |
| Western Interior    | 0.97       | 0.77-1.23     | 0.828               |
| <b>Year</b>         |            |               | 0.254 <sup>a</sup>  |
| 2014                | 1.00       | referent      |                     |
| 2015                | 0.95       | 0.85-1.07     | 0.402               |
| 2016                | 1.01       | 0.90-1.13     | 0.874               |
| 2017                | 1.02       | 0.91-1.15     | 0.672               |
| 2018                | 1.08       | 0.97-1.21     | 0.157               |
| <b>Sex</b>          |            |               |                     |
| Female              | 1.00       | referent      |                     |
| Male                | 1.00       | 0.93-1.08     | 0.929               |
| <b>Age Category</b> |            |               |                     |
| <70-years-old       | 1.00       | referent      |                     |
| ≥70-years-old       | 19.99      | 18.41-21.70   | <0.001              |

Abbreviations: IRR – Incidence rate ratio; CI – Confidence interval

<sup>a</sup> Overall p-value for variable estimated using a likelihood ratio test
